# Supplementary material for: Theoretical investigations on crystal crosslinking in perovskite solar cells
Source: Royal Society of Chemistry journal article supplement (doi:10.1039/c7tc03824k), 2017-11-22
Supplement: c7tc03824k1.pdf [file c7tc03824k1.pdf]

# Theoretical investigations on crystal crosslinking in perovskite solar cells

*Lei Zhang,<sup>ab\*</sup> Lei Xu,<sup>ab</sup> Fengxi Yu<sup>ab</sup> and Jingfa Li<sup>ab</sup>*

<sup>a</sup> Jiangsu Key Laboratory for Optoelectronic Detection of Atmosphere and Ocean, Nanjing University of Information Science & Technology, Nanjing 210044, China. \*Email: 002699@nuist.edu.cn

<sup>b</sup> Department of Applied Physics, School of Physics and Optoelectronic Engineering, Nanjing University of Information Science & Technology, Nanjing 210044, China

## Electronic Supplementary Information

### Table of Contents

|                                                                                                                                                                                                           |    |
|-----------------------------------------------------------------------------------------------------------------------------------------------------------------------------------------------------------|----|
| <b>Table S1</b> Change in Hirshfeld charge in the adsorbate (the crosslinking agent) and adsorbent (the halide perovskite substrate) upon molecular adsorption on the perovskite substrate.....           | S3 |
| <b>Figure S1</b> HOMO-1, HOMO, LUMO, LUMO+1, LUMO+2, LUMO+3 and LUMO+4 orbital distribution of <b>7-9</b> .....                                                                                           | S3 |
| <b>Figure S2</b> Molecular dynamics of the water interaction with the bare perovskite surface (left) and the perovskite surface capped by the crosslinking agents <b>7-9</b> (right).....                 | S4 |
| <b>Figure S3</b> Relative energies along three reaction coordinates (vertical translation along z-axis, x-translation and y-translation of the adsorbate at the perovskite surface) for <b>7-9</b> . .... | S5 |
| <b>Figure S4</b> The band structures of <b>7-9</b> along lines connecting high symmetry points G (0, 0, 0), X (0, 0.5, 0), M (0.5, 0.5, 0) and G (0, 0, 0).....                                           | S6 |
| <b>Figure S5</b> Band structures of <b>4-6</b> . ....                                                                                                                                                     | S6 |
| <b>Figure S6</b> PDOS of <b>4-6</b> .....                                                                                                                                                                 | S6 |

Table S1 Change in Hirshfeld charge in the adsorbate (the crosslinking agent) and adsorbent (the halide perovskite substrate) upon molecular adsorption on the perovskite substrate

|                      | 7     | 8     | 9     |
|----------------------|-------|-------|-------|
| Crosslinking Agent   | -0.39 | -0.54 | -0.64 |
| Perovskite Substrate | 0.39  | 0.54  | 0.64  |

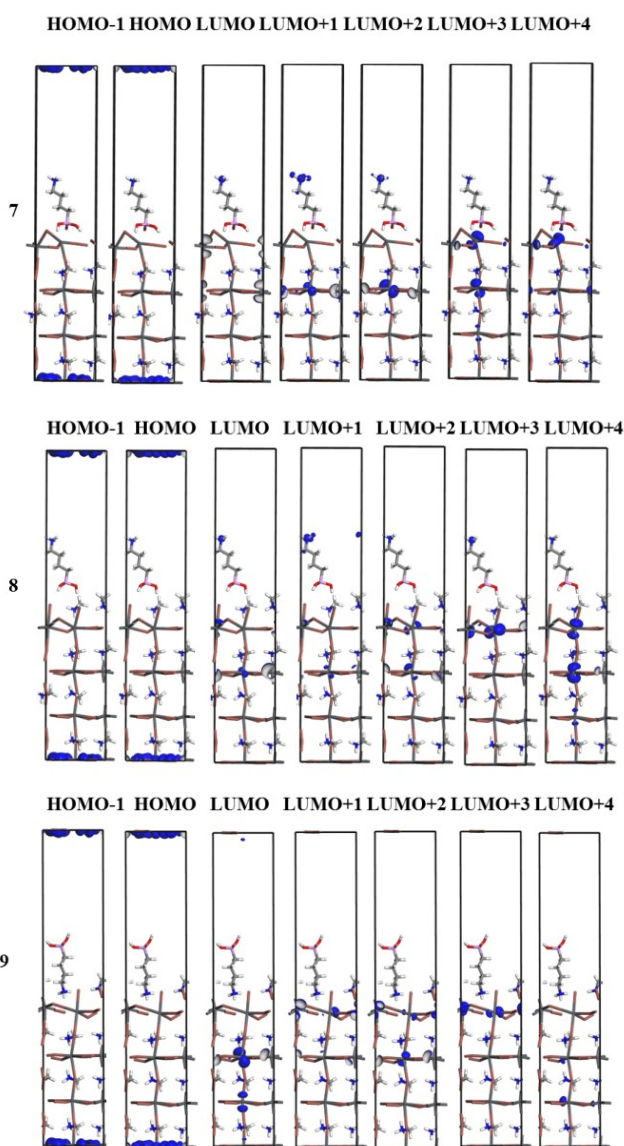

Figure S1 HOMO-1, HOMO, LUMO, LUMO+1, LUMO+2, LUMO+3 and LUMO+4 orbital distribution of 7-9

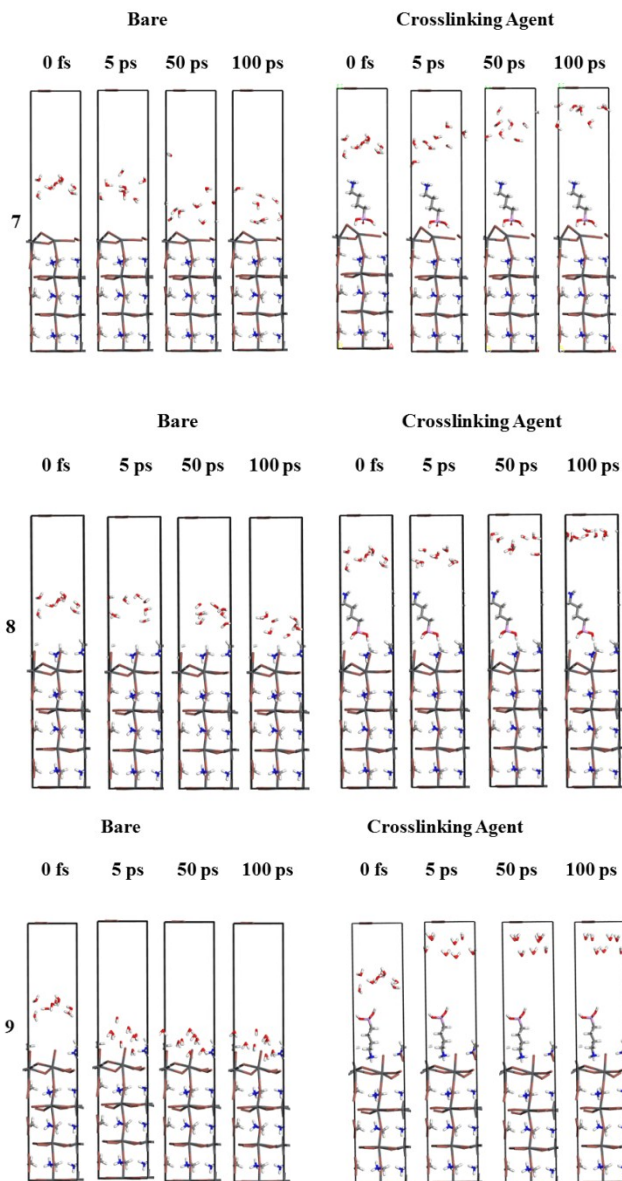

Figure S2 Molecular dynamics of the water interaction with the bare perovskite surface (left) and the perovskite surface capped by the crosslinking agents 7-9 (right). Snapshots at 0 fs, 4 ps, 40 ps and 100 ps are depicted in each case. Water molecules tend to approach the bare perovskite surface while they are expelled from the capped perovskite surface during the simulation time.

7

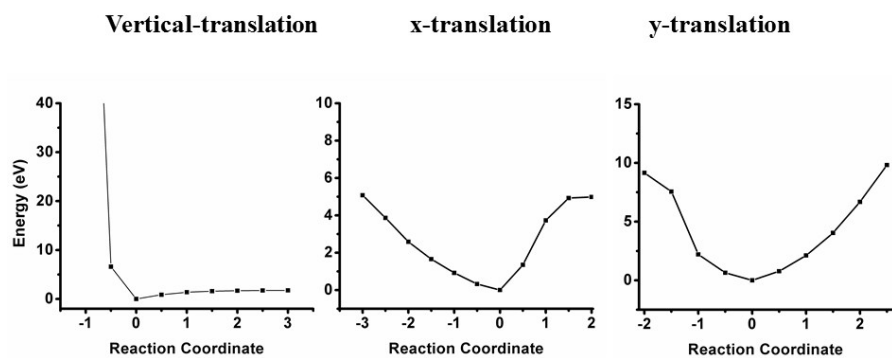

8

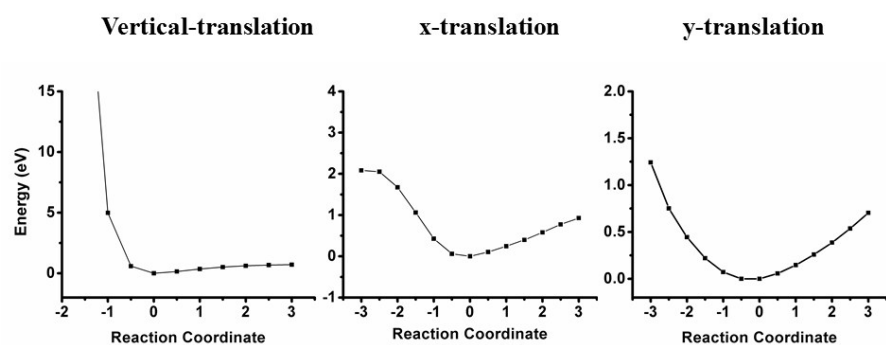

9

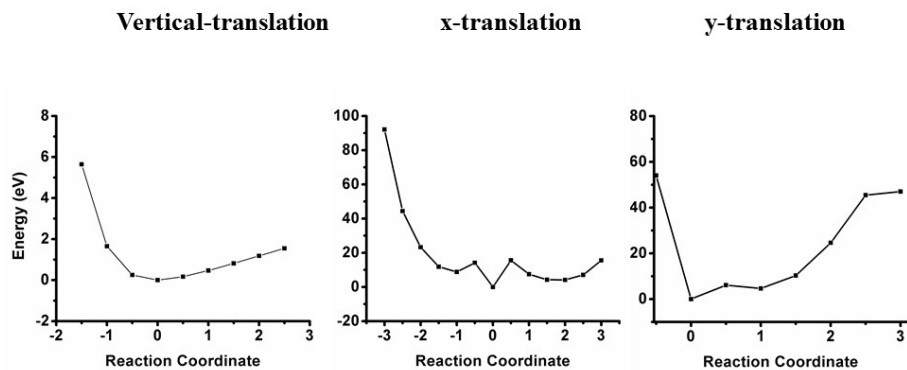

Figure S3 Relative energies along three reaction coordinates (vertical translation along z-axis, x-translation and y-translation of the adsorbate at the perovskite surface) for **7-9**. The optimized stable position is set to 0.

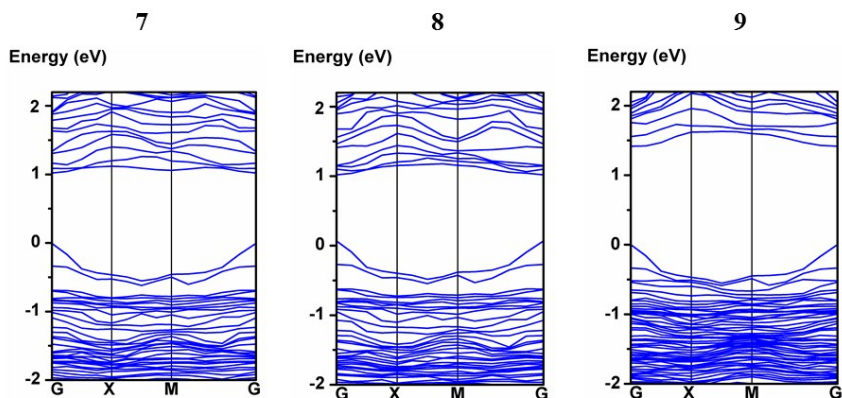

Figure S4 The band structures of **7-9** along lines connecting high symmetry points G (0, 0, 0), X (0, 0.5, 0), M (0.5, 0.5, 0) and G (0, 0, 0). The maximum energy of valence band is set to 0.

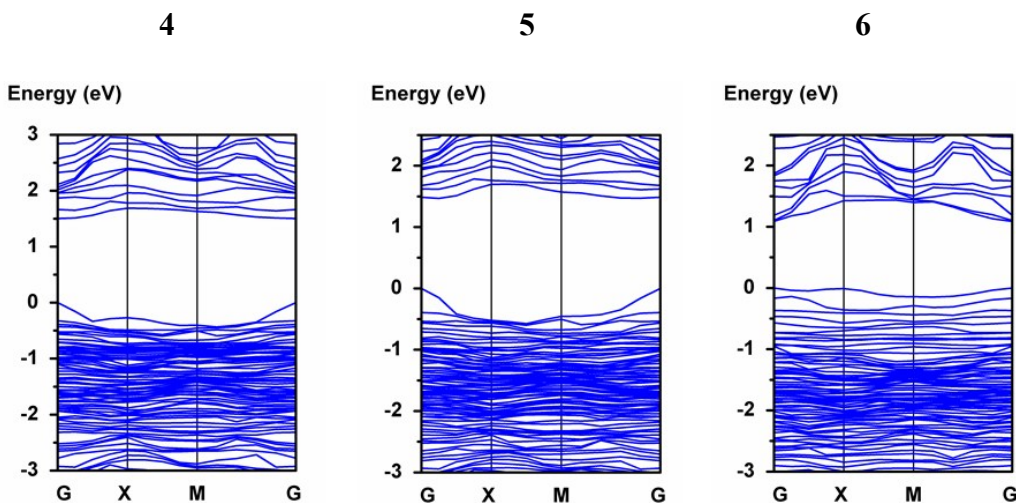

Figure S5 Band structures of **4-6**. The band gaps are 1.51 eV in **4** (1.51 eV from reference <sup>1</sup>), 1.47 eV (1.36 eV from reference <sup>2</sup>) in **5**, and 1.09 eV in **6**. The Experimental values are 1.55 – 1.70 eV.<sup>2-4</sup>

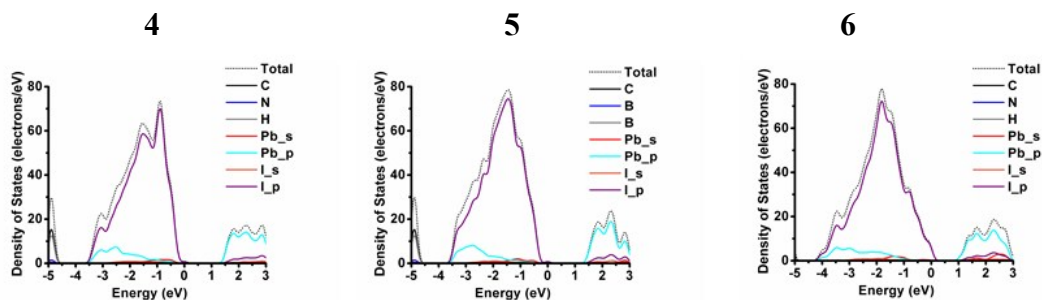

Figure S6 PDOS of **4-6** from -5 eV to 3 eV. In PDOS, the valence band is mainly contributed by the p orbital of I atoms and slightly by the s orbital of Pb atoms, while the conduction band is mainly contributed by the p orbital of Pb atoms and slightly by the s orbital of I atoms. These are consistent with the literature.<sup>1,5-7</sup>

## References

- (1) Long, R.; Fang, W.; Prezhdo, O. V. Moderate Humidity Delays Electron-Hole Recombination in Hybrid Organic-Inorganic Perovskites: Time-Domain Ab Initio Simulations Rationalize Experiments. *J. Phys. Chem. Lett.* **2016**, *7*, 3215–3222.
- (2) Quarti, C.; De Angelis, F.; Beljonne, D. Influence of Surface Termination on the Energy Level Alignment at the CH<sub>3</sub>NH<sub>3</sub>PbI<sub>3</sub> Perovskite/C<sub>60</sub> Interface. *Chem. Mater.* **2017**, *29*, 958–968.
- (3) D’Innocenzo, V.; Grancini, G.; Alcocer, M. J. P.; Kandada, A. R. S.; Stranks, S. D.; Lee, M. M.; Lanzani, G.; Snaith, H. J.; Petrozza, A. Excitons versus Free Charges in Organo-Lead Tri-Halide Perovskites. *Nat. Commun.* **2014**, *5*.
- (4) Schulz, P.; Edri, E.; Kirmayer, S.; Hodes, G.; Cahen, D.; Kahn, A. Interface Energetics in Organo-Metal Halide Perovskite-Based Photovoltaic Cells. *Energy Environ. Sci.* **2014**, *7*, 1377.
- (5) Torres, A.; Rego, L. G. C. Surface Effects and Adsorption of Methoxy Anchors on Hybrid Lead Iodide Perovskites: Insights for Spiro-MeOTAD Attachment. *J. Phys. Chem. C* **2014**, *118*, 26947–26954.
- (6) Koocher, N. Z.; Saldana-Greco, D.; Wang, F.; Liu, S.; Rappe, A. M. Polarization Dependence of Water Adsorption to CH<sub>3</sub>NH<sub>3</sub>PbI<sub>3</sub> (001) Surfaces. *J. Phys. Chem. Lett.* **2015**, *6*, 4371–4378.
- (7) Zhang, L.; Liu, X.; Su, J.; Li, J. First-Principles Study of Molecular Adsorption on Lead Iodide Perovskite Surface: A Case Study of Halogen Bond Passivation for Solar Cell Application. *J. Phys. Chem. C* **2016**, *120*, 23536–23541.
